# Supplementary material
Source: publisher figshare collection journal article supplement (https://acs.figshare.com/ndownloader/files/4421236)
Supplement: Supplementary file 1 [file 4421236]

# Self-Motion of a Benzoquinone Disk Coupled with a Redox Reaction

*Nobuhiko J. Suematsu, Yumi Miyahara, Yui Matsuda, and Satoshi Nakata\**

## Supporting Information (SI)

### 1. Redox reaction estimated by UV/vis spectra

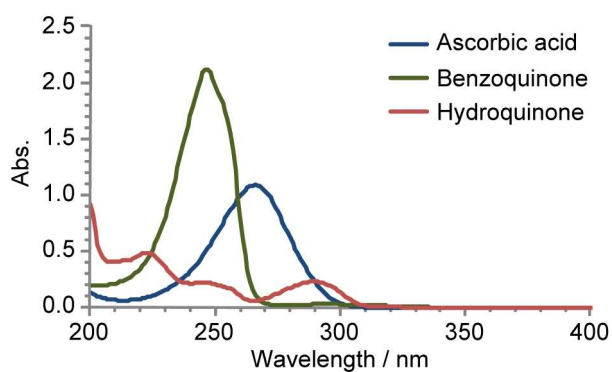

**Figure S1.** UV/vis spectra of BQ, HQ, and ascorbic acid. Concentration of every solution were 100  $\mu$ M.

## 2. Thermography

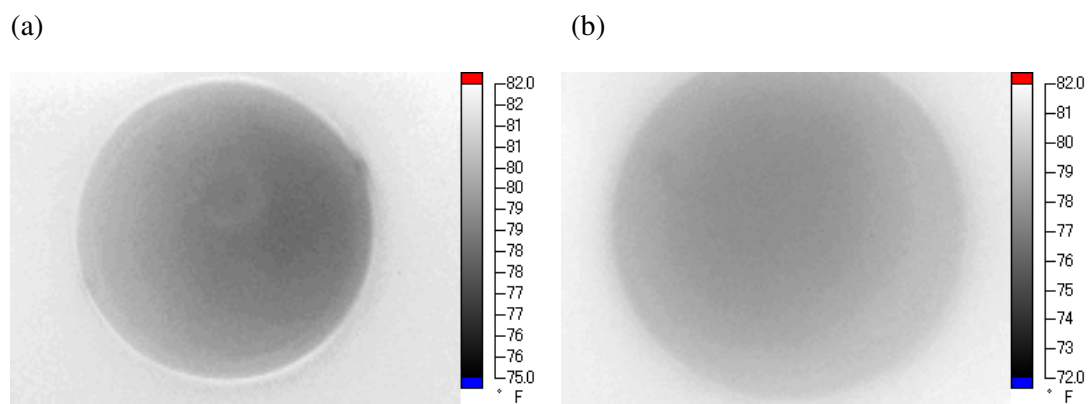

**Figure S2.** The thermography of the samples (a) ascorbic acid (50 mM), and (b) Ferricyanide (5- mM).
